# Supplementary material
Source: PubMed Central journal article supplement (PMC5745029)
Supplement: NIHMS506956-supplement-Supplemental_Data.pdf [file NIHMS506956-supplement-Supplemental_Data.pdf]

**Supporting Information**  
**Structural Requirements of the ASBT by 3D-QSAR Analysis Using Aminopyridine**  
**Conjugates of Chenodeoxycholic Acid**

Xiaowan Zheng, Yongmei Pan, Chayana Acharya<sup>†</sup>, Peter W. Swaan, James E. Polli\*

Department of Pharmaceutical Sciences, School of Pharmacy, University of Maryland,  
20 Penn Street, Baltimore, MD 21201, USA.

<sup>†</sup>Present Address: Institut Européen de Chimie et Biologie, Université Bordeaux 1, 2 rue  
Robert Escarpit, 33607 Pessac Cedex, France

\*To whom correspondence should be addressed. (e-mail: [jpolli@rx.umaryland.edu](mailto:jpolli@rx.umaryland.edu)); Tel.  
+1410-706-8292; Fax: +1 410-706-5017

Xiaowan Zheng and Yongmei Pan contributed equally to this work.

Running Title: conjugate QSAR for ASBT transporter

**Table S1.** Physicochemical characteristics of conjugates.

| Comp. | LC-MS/MS                |                            |                            |                      |                                       | <sup>1</sup> H-NMR (DMSO- <i>d</i> 6) <sup>d</sup>                                                                                                                     |
|-------|-------------------------|----------------------------|----------------------------|----------------------|---------------------------------------|------------------------------------------------------------------------------------------------------------------------------------------------------------------------|
|       | Exact Mass <sup>a</sup> | Q1 Mass (m/z) <sup>b</sup> | Q3 Mass (m/z) <sup>b</sup> | Retention Time (min) | X-Initial B% in gradient <sup>c</sup> |                                                                                                                                                                        |
| 1     | 597.38                  | 598.30                     | 94.90                      | 1.04                 | 35%                                   | 12.52 (1H, s, β), 10.44 (1H, s, γ), 8.29 (1H, d, α), 8.06 (1H, d, α), 8.00 (1H, d, γ), 7.75 (1H, t, α), 7.07 (1H, t, α), 4.17 (1H, m, θ)                               |
| 2     | 597.38                  | 598.41                     | 221.00                     | 1.24                 | 40%                                   | 12.34 (1H, s, β), 10.21 (1H, s, γ) 8.74 (1H, s, α) 8.26 (1H, d, α), 8.05 (1H, d, α), 8.00 (1H, d, γ) 7.35 (1H, t, α), 4.20 (1H, m, θ)                                  |
| 3     | 597.38                  | 598.41                     | 221.00                     | 2.24                 | 30%                                   | 12.63 (1H, s, β), 10.55 (1H, s, γ), 8.45 (2H, d, α), 8.09 (1H, d, γ), 7.66 (2H, d, α), 4.23 (1H, m, θ)                                                                 |
| 4     | 625.41                  | 626.31                     | 189.01                     | 1.23                 | 33%                                   | 12.50 (1H, s, β), 8.74 (1H, d, γ), 8.22 (1H, t, α), 8.09 (1H, d, γ), 8.05 (1H, t, γ), 7.72 (1H, t, α) 7.25 (1H, d, α), 4.12 (1H, m, θ) 3.52 (1H, m, α) 3.09 (1H, t, α) |
| 5     | 611.39                  | 612.30                     | 238.03                     | 1.55                 | 35%                                   | 12.41 (1H, s, β), 9.45 (1H, s, γ), 8.23 (1H, d, α), 8.08 (1H, d, γ), 7.78 (1H, d, α), 7.20 (1H, t, α), 4.22 (1H, m, θ), 2.39 (3H, s, α)                                |
| 6     | 611.39                  | 612.25                     | 238.03                     | 1.00                 | 40%                                   | 12.43 (1H, s, β), 9.51 (1H, s, γ), 8.49 (1H, s, α), 8.23 (1H, d, α) 8.09 (1H, d, γ) 7.24 (1H, d, α), 4.25 (1H, m, θ), 2.19 (3H, s, α)                                  |
| 7     | 611.39                  | 612.45                     | 108.91                     | 1.43                 | 40%                                   | 12.21 (1H, s, β), 10.08(1H, s, γ), 8.50 (1H, s, α), 8.03 (1H, d, γ), 8.07 (1H, s, α), 7.87 (1H, s, α), 4.31 (1H, m, θ), 2.40 (3H, s, α)                                |
| 8     | 611.39                  | 612.25                     | 237.99                     | 1.38                 | 35%                                   | 12.01 (1H, s, β), 10.03 (1H, s, γ), 8.57 (1H, s, α), 8.02 (1H, d, γ), 7.88 (1H, d, α), 7.16 (1H, d, α) 4.21 (1H, m, θ), 2.38 (3H, s, α)                                |
| 9     | 611.39                  | 612.30                     | 108.97                     | 1.98                 | 32%                                   | 12.03 (1H, s, β), 10.24 (1H, s, γ), 8.26 (1H, d, α), 8.03 (1H, d, γ), 7.43 (1H, s, α), 7.34 (1H, d, α) 4.31                                                            |

|           |        |        |        |      |     |                                                                                                                                                                                                                                                    |
|-----------|--------|--------|--------|------|-----|----------------------------------------------------------------------------------------------------------------------------------------------------------------------------------------------------------------------------------------------------|
| <b>10</b> | 625.41 | 626.81 | 234.04 | 1.46 | 35% | (1H, m, $\theta$ ) 2.39(3H, s, $\alpha$ )<br>11.57 (1H, s, $\beta$ ) 10.31 (1H, s, $\gamma$ ), 7.89 (1H, d, $\gamma$ ), 7.75 (1H, s, $\alpha$ ), 6.78 (1H, s, $\alpha$ ), 4.27 (1H, m, $\theta$ ) 2.32 (3H, s, $\alpha$ ), 2.24 (3H, s, $\alpha$ ) |
| <b>11</b> | 715.46 | 716.54 | NA     | NA   | NA  | 10.30 (1H, s, $\gamma$ ), 8.20 (1H, d, $\gamma$ ), 7.74 (1H, s, $\alpha$ ), 7.35 (5H, s, $\beta$ ), 6.78 (1H, s, $\alpha$ ), 5.09 (2H, s, $\beta$ ), 4.29 (1H, m, $\theta$ ), 2.33 (3H, s, $\alpha$ ), 2.24 (3H, s, $\alpha$ )                     |
| <b>12</b> | 625.41 | 626.41 | 123.00 | 1.10 | 32% | 11.48 (1H, s, $\beta$ ), 10.01 (1H, s, $\gamma$ ), 7.71 (1H, d, $\alpha$ ), 7.43 (1H, d, $\gamma$ ), 7.01 (1H, d, $\alpha$ ), 4.11 (H, m, $\theta$ ), 2.35 (3H, s, $\alpha$ ), 2.37 (3H, s, $\alpha$ )                                             |
| <b>13</b> | 715.46 | 716.57 | NA     | NA   | NA  | 9.38 (1H, s, $\gamma$ ), 8.25 (1H, d, $\gamma$ ), 4.31 (1H, m, $\theta$ ), 7.60 (1H, d, $\alpha$ ), 7.35 (5H, s, $\beta$ ), 7.03 (1H, d, $\alpha$ ), 5.12 (2H, s, $\beta$ ), 2.38 (3H, s, $\alpha$ ), 2.31 (3H, s, $\alpha$ )                      |
| <b>14</b> | 627.39 | 628.40 | 124.92 | 1.39 | 45% | 12.40 (1H, s, $\beta$ ), 9.92 (1H, s, $\gamma$ ), 8.33 (1H, s, $\gamma$ ), 8.04 (1H, d, $\gamma$ ), 7.87 (1H, d, $\alpha$ ), 6.77 (1H, d, $\alpha$ ), 4.19 (1H, m, $\theta$ ), 3.80 (3H, s, $\alpha$ )                                             |
| <b>15</b> | 612.39 | 613.40 | 220.50 | 1.76 | 35% | 12.56 (1H, s, $\beta$ ), 10.29 (1H, s, $\gamma$ ), 8.12 (1H, d, $\gamma$ ), 7.52 (1H, t, $\alpha$ ), 7.31 (2H, s, $\alpha$ ) 6.34 (1H, d, $\alpha$ ), 5.93 (1H, d, $\alpha$ ), 4.24 (1H, m, $\theta$ )                                             |
| <b>16</b> | 613.37 | 614.40 | 221.97 | 1.18 | 40% | 12.59 (1H, s, $\beta$ ), 10.25 (1H, s, $\gamma$ ), 8.09 (1H, d, $\gamma$ ), 7.90 (1H, d, $\alpha$ ), 7.30 (1H, d, $\alpha$ ), 7.18 (1H, t, $\alpha$ ) 5.47 (1H, s, $\alpha$ ), 4.18 (1H, m, $\theta$ )                                             |
| <b>17</b> | 703.42 | 704.41 | 312.07 | 2.55 | 48% | 10.20 (1H, s, $\gamma$ ), 8.25 (1H, d, $\gamma$ ), 7.88 (1H, d, $\alpha$ ), 7.35 (5H, s, $\beta$ ), 7.27 (1H, d, $\alpha$ ), 7.14 (1H, t, $\alpha$ ), 5.11 (2H, s, $\beta$ ), 4.30 (1H, m, $\theta$ )                                              |
| <b>18</b> | 615.37 | 616.40 | 112.91 | 1.36 | 45% | 12.50 (1H, s, $\beta$ ), 9.93 (1H, s, $\gamma$ ), 8.41 (1H, d, $\alpha$ ), 8.06 (1H, d, $\gamma$ ), 7.92 (1H, d, $\alpha$ ), 7.33 (1H, t, $\alpha$ ), 4.19 (1H, m, $\theta$ )                                                                      |
| <b>19</b> | 615.37 | 616.41 | 112.98 | 1.52 | 40% | 12.48 (1H, s, $\beta$ ), 10.70 (1H, s, $\gamma$ ), 8.58 (1H, s, $\alpha$ ), 8.26 (1H, s, $\alpha$ ), 8.13 (1H, d, $\gamma$ ), 8.08 (1H, s, $\alpha$ ), 4.21 (1H, m, $\theta$ )                                                                     |

|           |        |               |        |      |     |                                                                                                                                                                                                        |
|-----------|--------|---------------|--------|------|-----|--------------------------------------------------------------------------------------------------------------------------------------------------------------------------------------------------------|
| <b>20</b> | 615.37 | 616.40        | 224.80 | 1.59 | 40% | 12.57 (1H, s, $\beta$ ), 10.25 (1H, s, $\gamma$ ), 8.42 (1H, s, $\alpha$ ), 8.17 (1H, d, $\alpha$ ), 8.11 (1H, d, $\gamma$ ), 7.17 (1H, d, $\alpha$ ), 4.34 (1H, m, $\theta$ )                         |
| <b>21</b> | 675.29 | 676.3/678.30  | 599.40 | 4.73 | 45% | 12.56 (1H, s, $\beta$ ), 10.35 (1H, s, $\gamma$ ), 9.35 (1H, s, $\alpha$ ), 8.09 (1H, d, $\gamma$ ), 8.63 (1H, s, $\alpha$ ), 8.36 (1H, s, $\alpha$ ), 4.24 (1H, m, $\theta$ )                         |
| <b>22</b> | 675.29 | 676.3/678.26  | 172.81 | 5.69 | 45% | 12.54 (1H, s, $\beta$ ), 10.27 (1H, s, $\gamma$ ), 8.57 (1H, s, $\alpha$ ), 8.09 (1H, d, $\gamma$ ), 7.96 (1H, d, $\alpha$ ), 7.56 (1H, d, $\alpha$ ), 4.23 (1H, m, $\theta$ )                         |
| <b>23</b> | 631.34 | 632.30/634.30 | 540.16 | 4.87 | 40% | 12.56 (1H, s, $\beta$ ), 10.29 (1H, s, $\gamma$ ), 8.58 (1H, s, $\alpha$ ), 8.10 (1H, d, $\gamma$ ), 8.06 (1H, d, $\alpha$ ), 7.45 (1H, d, $\alpha$ ) 4.24 (1H, m, $\theta$ )                          |
| <b>24</b> | 631.34 | 632.30/634.40 | 128.92 | 4.45 | 43% | 12.51 (1H, s, $\beta$ ), 11.45 (1H, s, $\gamma$ ), 8.84 (1H, s, $\alpha$ ), 8.68 (1H, d, $\alpha$ ), 8.18 (1H, d, $\gamma$ ), 8.04 (1H, d, $\alpha$ ), 4.22 (1H, m, $\theta$ )                         |
| <b>25</b> | 612.38 | 613.40        | 221.12 | 2.72 | 35% | 12.49 (1H, s, $\beta$ ), 9.76 (1H, s, $\gamma$ ), 8.06 (1H, s, $\gamma$ ), 7.66 (1H, d, $\alpha$ ), 6.93 (1, t, $\alpha$ ), 6.84 (1H, d, $\alpha$ ), 6.75 (1H, t, $\alpha$ ), 4.30 (1H, m, $\theta$ )  |
| <b>26</b> | 612.38 | 613.30        | 220.94 | 1.83 | 40% | 12.58 (1H, s, $\beta$ ), 9.82 (1H, s, $\gamma$ ), 8.07 (1H, d, $\gamma$ ), 7.21 (1H, s, $\alpha$ ), 7.08 (1H, t, $\alpha$ ), 6.97 (1H, d, $\alpha$ ), 6.46 (1H, d, $\alpha$ ), 4.15 (1H, m, $\theta$ ) |
| <b>27</b> | 612.38 | 613.31        | 220.81 | 1.44 | 45% | 12.53 (1H, s, $\beta$ ), 9.63 (1H, s, $\gamma$ ) 8.06 (1H, d, $\gamma$ ), 7.34 (2H, d, $\alpha$ ), 6.68 (2H, d, $\alpha$ ), 4.20 (1H, m, $\theta$ )                                                    |

<sup>a</sup> Calculated monoisotopic mass.

<sup>b</sup> Q1 and Q3 mass are experimental mass [M+H]<sup>+</sup>.

<sup>c</sup> The mobile phase was A, 0.1% formic acid in water; and B, 0.1% formic acid in acetonitrile. The gradient times were listed as percent organic phase, B%. 0–0.2 (X%), 0.2–3.0 (X–95%), 3.0–4.0 (95%), 4.0–4.2 (95–X%), and 4.2–7.0 min (X%)

<sup>d</sup> Only characteristic peaks are shown, CDCA region and methylene peaks are not shown; values are in ppm relative to TMS;  $\beta$  indicates assignment to proton peaks in R<sub>1</sub>;  $\alpha$  indicates assignment to protons in R<sub>2</sub>;  $\gamma$  indicates assignment to protons in amide,  $\theta$  indicates the proton in  $\alpha$  carbon.

**Table S2.** 3D-QSAR models for inhibition and transport efficiency.

| Comp.                 | Obs. $pK_i^a$ | Pre. $pK_i$ |          | Obs. $\text{Log}(J_{\max}/K_t)^b$ | Pre. $\text{Log}(J_{\max}/K_t)$ |
|-----------------------|---------------|-------------|----------|-----------------------------------|---------------------------------|
|                       |               | CoMFA-1     | CoMSIA-3 |                                   |                                 |
| <b>1</b>              | 5.28          | 5.26        | 5.29     | 0.790                             | 0.794                           |
| <b>2<sup>c</sup></b>  | 5.82          | 5.09        | 4.93     | 1.45                              | 0.479                           |
| <b>3</b>              | 5.06          | 5.02        | 5.00     | 0.300                             | 0.307                           |
| <b>4</b>              | 5.15          | 5.10        | 5.23     | 0.280                             | 0.279                           |
| <b>5</b>              | 5.33          | 5.36        | 5.42     | -0.150                            | -0.151                          |
| <b>6</b>              | 4.96          | 5.01        | 4.91     | -0.410                            | -0.412                          |
| <b>7</b>              | 4.63          | 4.62        | 4.71     | 0.290                             | 0.289                           |
| <b>8</b>              | 5.1           | 5.31        | 5.20     | 0.0800                            | 0.0770                          |
| <b>9</b>              | 5.55          | 5.57        | 5.43     | 0.300                             | 0.298                           |
| <b>10</b>             | 5.18          | 5.11        | 5.17     | 0.980                             | 0.984                           |
| <b>11</b>             | 3.91          | 3.94        | 4.00     | ND                                | ND                              |
| <b>12</b>             | 5.72          | 5.58        | 5.70     | -0.260                            | -0.257                          |
| <b>13</b>             | 4.55          | 4.50        | 4.51     | ND                                | ND                              |
| <b>14</b>             | 5.05          | 5.05        | 5.11     | 1.31                              | 1.31                            |
| <b>15</b>             | 5.08          | 5.10        | 5.10     | 1.51                              | 1.51                            |
| <b>16</b>             | 5.51          | 5.55        | 5.48     | 1.16                              | 1.16                            |
| <b>17</b>             | 4.75          | 4.78        | 4.66     | NM                                | NM                              |
| <b>18<sup>c</sup></b> | 5.24          | 5.09        | 5.11     | 3.43                              | 0.783                           |
| <b>19</b>             | 5.16          | 5.09        | 5.00     | 0.920                             | 0.925                           |
| <b>20</b>             | 5.24          | 5.09        | 5.12     | 0.420                             | 0.418                           |
| <b>21</b>             | 5.3           | 5.09        | 5.36     | 0.310                             | 0.308                           |
| <b>22<sup>c</sup></b> | 4.68          | 4.74        | 4.67     | 0.620                             | 0.331                           |
| <b>23</b>             | 5.1           | 5.10        | 5.25     | NM                                | NM                              |
| <b>24</b>             | 5.1           | 5.15        | 5.13     | NM                                | NM                              |
| <b>25<sup>c</sup></b> | 5.45          | 5.27        | 5.47     | 1.42                              | 0.649                           |
| <b>26</b>             | 5.61          | 5.65        | 5.66     | 1.15                              | 1.15                            |
| <b>27</b>             | 5.14          | 5.20        | 5.12     | 0.460                             | 0.457                           |

<sup>a</sup>  $-\log(K_i)$  calculated from observed  $K_i$ .

<sup>b</sup> Calculated from  $\log(\text{norm}J_{\max}/K_t \times 100)$

<sup>c</sup> **2**, **18**, **22**, and **25** were used as test set.

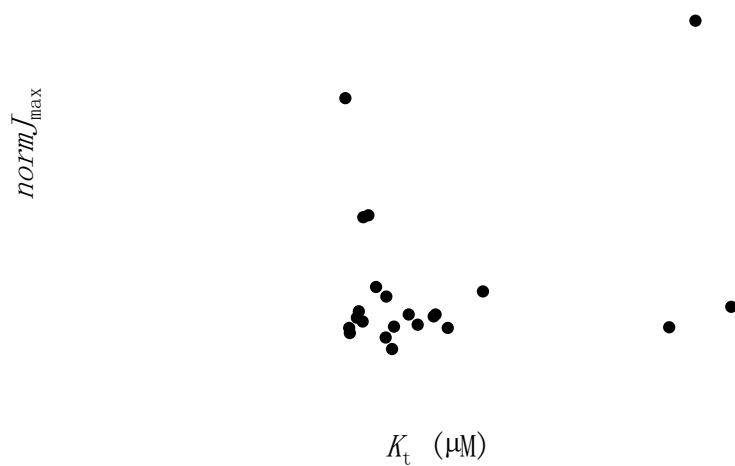

**Figure S1.** Relationship between  $normJ_{max}$  and  $K_t$ . Transporting capacity was not associated with transporter affinity. Linear regression showed a slope of  $0.008 \mu\text{M}^{-1}$  and  $r^2$  of 0.064. **15, 18, 22,** and **25** yielded  $J_{max}$  higher than taurocholate. All other conjugates exhibited  $J_{max}$  less than taurocholate  $J_{max}$ , and ranged from 0.0791 to 0.716.

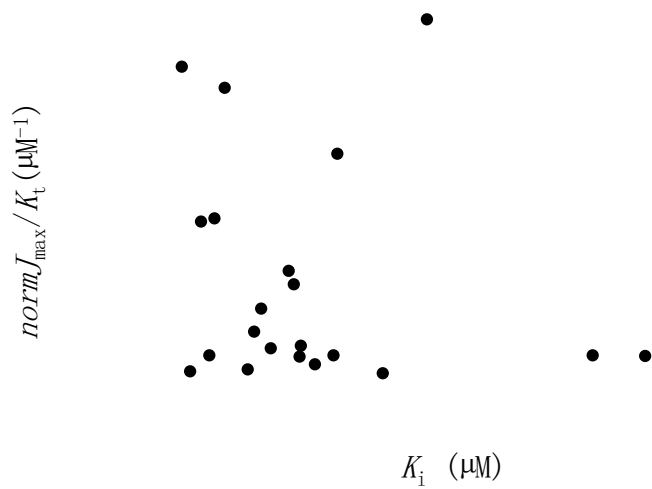

**Figure S2.** Relationship between  $normJ_{max}/K_t$  and  $K_i$ . Linear regression showed a slope of  $-0.003 \mu\text{M}^{-2}$  and  $r^2$  of 0.028. Transporting efficiency was not associated with inhibition potency. **18** was removed from the plot due to its high  $normJ_{max}/K_t$  value of 26.7.
